# Supplementary material for: Entangled Motifs in Membrane Protein Structures
Source: MDPI journal article supplement (doi:10.3390/ijms24119193), 2023-05-24
Supplement: s1 [file s1]

# Entangled Motifs in Membrane Protein Structures

Leonardo Salicari <sup>1,2</sup> and Antonio Trovato <sup>1,2,\*</sup>

**1** Department of Physics and Astronomy ‘Galileo Galilei’, University of Padova, Via Marzolo 8,  
35031 Padova, PD, Italy

**2** National Institute of Nuclear Physics (INFN), Padova Section, Via Marzolo 8,  
35131 Padova, PD, Italy

\* [antonio.trovato@unipd.it](mailto:antonio.trovato@unipd.it)

## Supplementary Figures

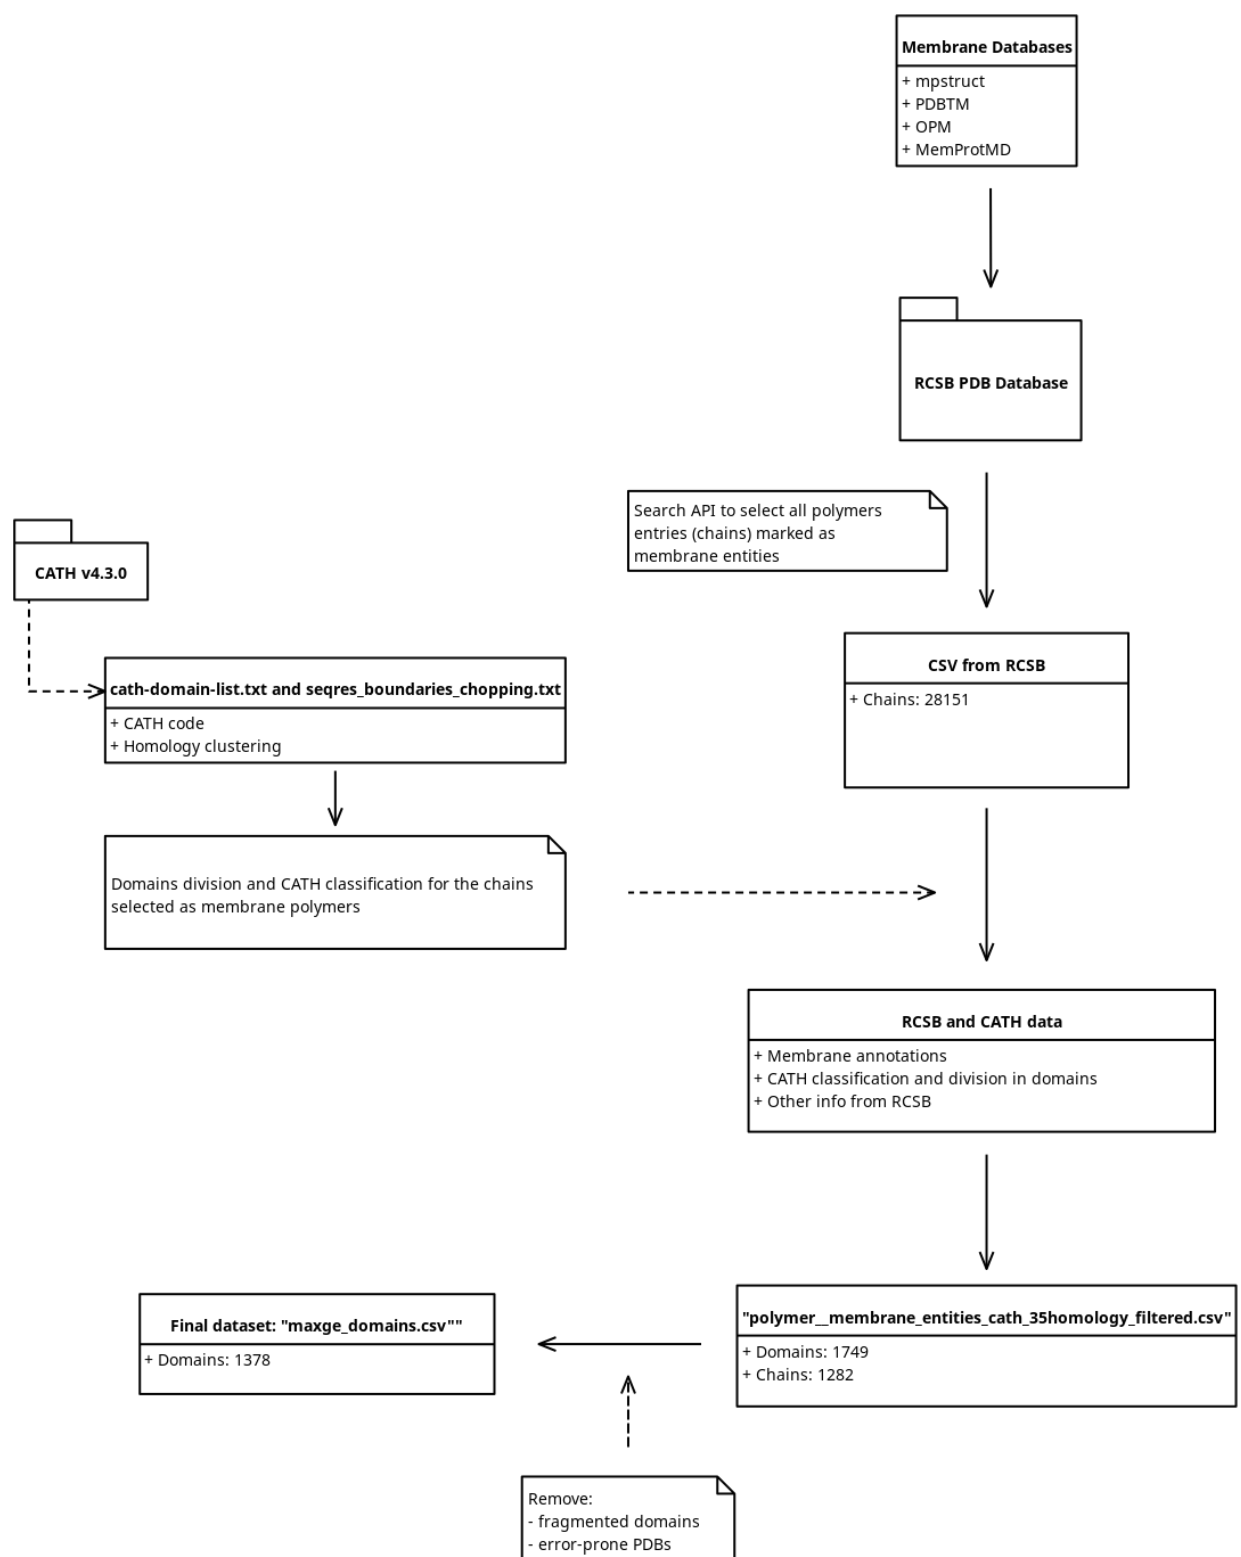

FIG. S1. Pipeline for the generation of the data set of membrane protein domains.
